# Supplementary material for: Efficacy of Sleeve Gastrectomy with Concomitant Hiatal Hernia Repair versus Sleeve–Fundoplication on Gastroesophageal Reflux Disease Resolution: Systematic Review and Meta-Analysis
Source: MDPI journal article supplement (doi:10.3390/jcm12093323), 2023-05-06
Supplement: s1 [file s1]

Supplementary material

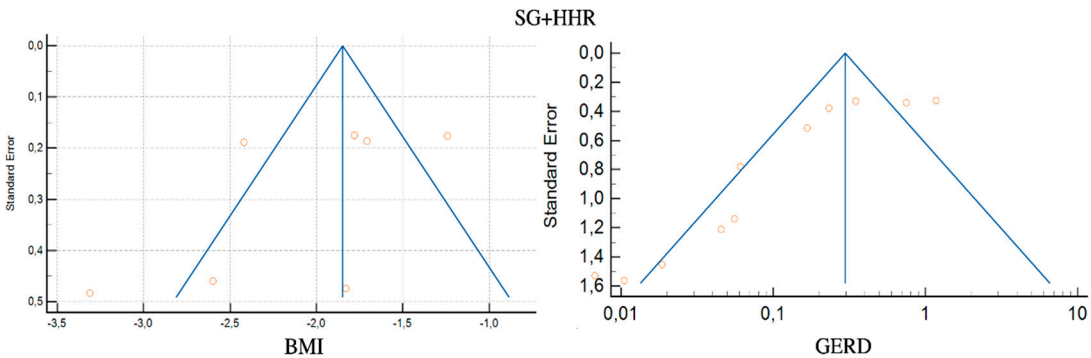

Supplementary figure S1. Funnel plot for GERD and BMI in patients assigned to SG+HHR

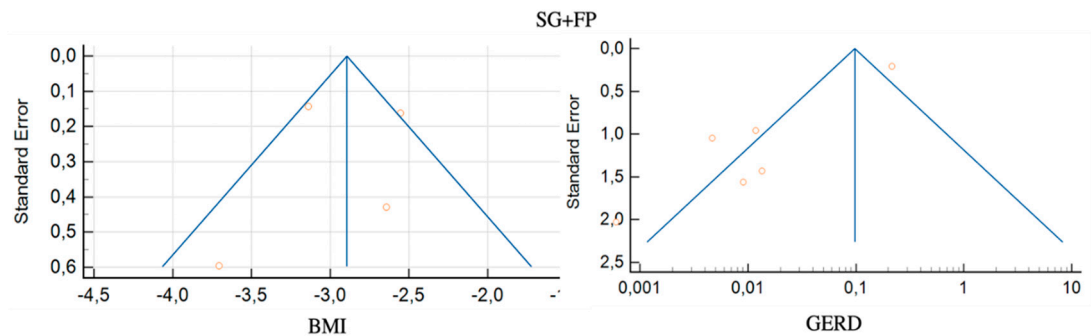

Supplementary figure S2. Funnel plot for GERD and BMI in patients assigned to SG+FP
